1 **Title**

2 Importance of cell division angle, position of cell proliferative area, and localization of  
3 AN3 in lateral organ morphology

4

5 **Authors**

6 Ayaka Kinoshita<sup>1\*</sup>, Makiko Naito<sup>1\*</sup>, Hirokazu Tsukaya<sup>1</sup>

7 \*Contributed equally to this work

8

9 **Affiliations**

10 <sup>1</sup>Graduate School of Science, The University of Tokyo, Tokyo, Japan

11

12 **Correspondence**

13 Corresponding Author: Hirokazu Tsukaya

14 Contact: [tsukaya@bs.s.u-tokyo.ac.jp](mailto:tsukaya@bs.s.u-tokyo.ac.jp)

15

16 **Word counts & number of figures**

17 Total (main body): 5730 words

18 Introduction: 993 words

19 Materials and Methods: 1156 words

20 Results: 1514 words

21 Discussion: 2067 words

22 Number of figures: 11

23 Number of supporting information: 1

## 24 **Abstract**

25 Leaf meristem is a cell proliferative zone present in the lateral organ primordia, and it  
26 contributes to the expansion of lateral organ lamina. In this study, we investigated how  
27 the proliferative zone affects the final morphology of the lateral organs. We examined  
28 how cell proliferative zones differ in the primordia of polar –auxin transport inhibitor  
29 (PATI)-treated leaves and floral organs from normal foliage leaf primordia of *Arabidopsis*  
30 *thaliana* with focus on the spatial accumulation pattern of mRNA and protein of  
31 *ANGUSTIFOLIA3 (AN3)*, a key element for leaf meristem positioning. As a result, we  
32 revealed that organ shape change by PATI treatment could not be attributed to changes in  
33 leaf-meristem positioning, size of the leaf meristem, or the expression pattern of *AN3*.  
34 Instead, it was attributed to altered cell division angles in the leaf meristem. In contrast,  
35 different shapes between sepals and petals compared with foliage leaves were observed  
36 to be correlated with both altered meristem position associated with altered *AN3*  
37 expression patterns and different distributions of cell division angles. These results  
38 strongly indicate that lateral organ shapes are regulated via two aspects: position of  
39 meristem and cell division angles; the former is mainly governed by the *AN3* expression  
40 pattern.

41

## 42 **Key words**

43 *AN3*, cell division, lateral organ, leaf meristem, morphology, polar-auxin-inhibitor

44

## 45 **Introduction**

46 The shape of the leaf plays an important role in determining its photosynthetic  
47 function. Moreover, the shape of floral organs, which are evolutionarily derived from

48 leaves, is also important for reproductive success. Therefore, the shape of these lateral  
49 organs varies among species to maximize their survival ability in their natural habitats.  
50 To understand these variations, it is important to understand their developmental  
51 properties.

52         The center of morphogenesis in plants is the meristem, where active cell division  
53 occurs. The shoot apical meristem (SAM) is essential for the production of new above-  
54 ground organs. In terms of lateral organs, especially for leaf primordia, the leaf meristem  
55 supplies cells to the leaf blade; thus, researchers have investigated the nature of the  
56 meristem to understand the morphogenesis of lateral organs (e.g. Esau, 1977; Donnelly  
57 *et al.*, 1999; Kazama *et al.*, 2010; Ichihashi *et al.*, 2011).

58         In many angiosperms, such as *Arabidopsis thaliana*, the leaf meristem is at the  
59 base of each leaf (Tsukaya, 2014). Cell proliferation initially occurs throughout the leaf  
60 primordium but is restricted to its basal regions as the leaf primordium grows further  
61 (Donnelly *et al.*, 1999; Kazama *et al.*, 2010). The control on the restriction of cell  
62 proliferation zone is not completely understood, but a transcriptional coactivator called  
63 ANGUSTIFOLIA3 (AN3)/GRF-INTERACTING FACTOR1(GIF1) is considered to  
64 positively control cell proliferation in leaf primordia; the spatial patterns of AN3/GIF1  
65 accumulation match well the cell proliferation zone, suggesting that AN3/GIF1 may act  
66 as an important determinant in positioning the leaf meristem(Horiguchi *et al.*, 2005;  
67 Kawade *et al.*, 2017) Cell division angles in the *AN3*-expressing region, except for areas  
68 along the margin and vasculature, were observed to be randomized (Yin & Tsukaya, 2016).  
69 *AN3* encodes a protein that is homologous to the human synovial sarcoma translocation  
70 protein (Horiguchi *et al.*, 2005; Nelissen *et al.*, 2015), and during leaf development, it is  
71 expressed at the base of leaf primordia. AN3 protein moves (Kawade *et al.*, 2013) and

72 forms a gradient along the proximal-distal axis on the leaf, with the leaf base having the  
73 highest concentration of AN3 protein (Kawade *et al.*) and thus is involved in the  
74 positioning of the leaf meristem. However, how *AN3* expression is controlled within the  
75 leaf meristem is still unknown.

76 AN3 is also involved in the morphogenesis of each floral organ (Lee *et al.*, 2009a,  
77 2014). A petal in the *an3* mutant has a smaller number of cells and a narrower shape than  
78 that of the wild type (Lee *et al.*, 2009b), as seen in the foliage leaves, suggesting a  
79 common role of AN3 in leaf and floral organ primordia. However, cell proliferation is  
80 active in the distal part of the petal primordia and not in the basal part, as in the leaf  
81 primordia (Disch *et al.*, 2006; Anastasiou *et al.*, 2007). Thus, if AN3 has the same role  
82 in the positional determination of the meristematic zone in petal primordia, AN3 proteins  
83 are expected to accumulate apically and not basally in petal primordia; however, no  
84 previous studies have examined it. Marginal/apical positioning of meristematic zone in  
85 petals may be an ancestral character that is directly comparable to apical positioning of  
86 SAM (Boyce, 2007). Although the basal positioning of the leaf meristem is common in  
87 angiosperms, marginal/apical positioning in leaf primordia is also known in some ferns  
88 and gymnosperms. Therefore, a comparison of leaf primordia with floral organ primordia  
89 of the same species, with special emphasis on *AN3* expression, may contribute towards  
90 understanding the roles and evolutionary history of differences in the positioning of cell  
91 proliferation activity in the primordia of these lateral organs.

92 The venation pattern is an observed difference between the leaves of  
93 angiosperms, ferns, and gymnosperms (Boyce, 2007). In the lateral organs of ferns and  
94 gymnosperms harboring meristems along the apical margin, the leaf vein shows a  
95 bifurcated pattern and is open at the end. In contrast, lobed and closed patterns are

96 common in eudicots including *A. thaliana*, and parallel patterns are common in monocots  
97 (Dengler & Kang, 2001). Thus, the venation pattern may be important in regulating leaf  
98 organogenesis. Mutants with an abnormal venation pattern mostly show altered leaf  
99 shapes in *A. thaliana* (Candela *et al.*, 1999). Based on this correlation, an interaction  
100 between spatial control of the leaf cell proliferation zone and leaf venation pattern has  
101 been suggested (Boyce, 2007).

102 In vein development in the leaf, biosynthesis and transportation of the plant  
103 hormone auxin (indole-3-acetic acid, IAA) plays an important role (Cheng *et al.*, 2006).  
104 For example, *GNOM* and *PIN-FORMED* (*PIN*) genes that control polar auxin transport  
105 (*PAT*) (Verna *et al.*, 2019) regulate the vein formation during leaf development. Members  
106 of the *PIN* family have been extensively studied as major factors in *PAT*, the most famous  
107 being *PIN1* (Okada *et al.*, 1991). Mutations in many *PIN* genes induce defects in leaf vein  
108 patterns, with wide and bifurcated midveins and altered leaf blade shapes (Sawchuk *et*  
109 *al.*, 2013).

110 Many *PAT* inhibitors (*PATIs*) have been used to examine the role of *PAT* in plant  
111 organogenesis, including 2,3,5-triiodobenzoic acid (*TIBA*) and N-1-naphthylphthalamic  
112 acid (*NPA*). Through indirect evidence, they bind to the same auxin efflux carriers to  
113 inhibit their activity (Teale & Palme, 2018). When plants are treated with *PATI*, their  
114 leaves exhibit abnormal leaf venation patterns, including very thick midveins and  
115 marginal veins, similar to that of *pin1* mutants (Sieburth, 1999). In addition, leaf shape  
116 becomes rounder and shorter than that of control plants. However, to date, no study has  
117 examined the effect of *PATI* on the cell proliferation pattern in leaf primordia.

118 To completely understand the morphogenesis process of lateral organs, it is  
119 necessary to understand the role of the lateral organ meristem on the final organ shape

120 and factors that affect the properties of meristems. In this study, we utilized PATI-treated  
121 leaves and floral organs as leaves with altered venation patterns or modified leaves and  
122 investigated the spatial position of cell proliferative area, cell division angle, and possible  
123 factors that control the properties of lateral organ meristems, using AN3 as a key clue.

124

## 125 **Materials and Methods**

### 126 Plant growth

127 For analysis of the leaf primordia, *A. thaliana* Col-0 (wild type [WT]), or those  
128 carrying *CYCLINB1;1(CYCB1;1)::GUS*, *an3-4*, *an3-4/pAtAN3::AN3-GREEN*  
129 *FLUORESCENT PROTEIN (GFP)*, *an3-4/pAtAN3::AN3-3xGFP*, *gl-s92f*, or *gl-s92f/an3*  
130 were grown on sterile growth medium that contained 0.5 × Murashige and Skoog medium  
131 (MS, Wako, Osaka, Japan), 1% (w/v) sucrose (Nacalai Tesque, Kyoto, Japan), and 0.8%  
132 (w/v) agar (Nacalai Tesque, Kyoto, Japan) (Wako, Osaka, Japan) adjusted to pH 5.8  
133 (KOH). Approximately, 1 M PATI (TIBA and NPA) stocks were dissolved in dimethyl  
134 sulfoxide and added to the medium to a final concentration of 10 μM. The medium  
135 composition was based on that described by Sieburth (1999).

136 Seeds were sterilized by immersing in a solution of 2% (v/v) Plant Preservative  
137 Mixture™ (Plant Cell Technology, Washington, D.C., USA), 0.1% (v/v) Triton X-100  
138 (Nacalai Tesque, Kyoto, Japan), and 50 mg/L MgSO<sub>4</sub> for 6 h or a solution of 10% (v/v)  
139 sodium hypochlorite (Nacalai Tesque, Kyoto, Japan) and 1% (v/v) Triton X-100 for 5 min  
140 and twice with sterile water prior to plating. The plates were incubated at 24°C under  
141 constant illumination.

142 For analyses of the floral organ primordia, *A. thaliana* Col-0 and *an3-*  
143 *4/pAtAN3::AN3-1xGFP* (Kawade *et al.*, 2013) were sown on rockwool (Toyobo, Osaka,

144 Japan) and grown under white fluorescent light conditions (ca. 40  $\mu\text{mol m}^{-2} \text{s}^{-1}$ ) at 22–  
145 23°C supplied with water containing 1 g/L powder Hyponex (Hyponex, Osaka, Japan).

146

#### 147 GUS experiments

148 Detection of  $\beta$ -glucuronidase (GUS) activity was carried out using 5-bromo-4-  
149 chloro-3-indolyl- $\beta$ -D-glucuronide (X-Gluc) as a substrate. Plant tissue was first placed in  
150 90% (v/v) acetone on ice for 10 min, washed with sodium phosphate buffer (pH 7.0), and  
151 then placed in X-Gluc buffer solution (0.5 mg/mL X-Gluc, 100 mM  $\text{NaPO}_4$  (pH 7.0), 5  
152 mM  $\text{K}_3\text{Fe}(\text{CN})_6$ , 5 mM  $\text{K}_4\text{Fe}(\text{CN})_6$ , 10 mM EDTA, 0.1% (v/v) Triton X-100) under  
153 vacuum for 15 min or more and then placed in the dark at room temperature (ca. 20°C).

154 After GUS detection, plant tissues were rinsed in 70% (v/v) ethanol and fixed in  
155 ethanol: acetic acid (6:1) solution. After chlorophyll was removed, the tissue was  
156 preserved in 70% EtOH in the dark. Plant tissues were mounted on slides with chloral  
157 hydrate solution (50 g chloral hydrate, 5 g glycerol, 12.5 mL distilled water) (Tsuge *et al.*,  
158 1996) and observed under a microscope after the tissue became transparent enough.

159

#### 160 AN3-GFP observations

161 Leaf primordia (5 days after sowing stage: DAS) and flower primordia of *A.*  
162 *thaliana an3-4/pAN3::AN3-GFP* and *an3-4/pAN3::AN3-3xGFP* lines were fixed in 4%  
163 (v/v) paraformaldehyde (PFA) in phosphate-buffered saline (PBS) with 0.05% (v/v)  
164 Triton X-100 by immersing them in the fixation mixture, deairing them for 10 min (for  
165 leaf primordia) or 15 min (twice, for flower primordia) and placed at 4°C overnight.  
166 The samples were then washed in PBS (10 min, twice) and stored in PBS at room  
167 temperature for leaf primordia and at 4°C for flower primordia until observation.

168           The samples were then dissected using a sharp razor under the microscope. Leaf  
169 primordia were mounted on slides with PBS and observed under a confocal microscope  
170 (FV3000; Olympus, Tokyo, Japan) with a GFP filter for leaf primordia and an upright  
171 fluorescent microscope (DM4000; Leica Microsystems GmbH, Wetzlar, Germany) for  
172 floral organ primordia.

173

#### 174 Data analysis on the position of leaf meristem and the arrest front

175           This method was derived from Kazama *et al.* (2010) and Ikeuchi *et al.* (2011).  
176 This method is used to determine the position of the leaf meristem. First, an image of a  
177 leaf with a GUS expression pattern was prepared. The outer region of leaf was cropped,  
178 and the image was rotated so that the leaf base was on the left side of the image. Then,  
179 the blue region was extracted, and a binary image was created using ImageJ  
180 (<https://imagej.nih.gov/ij/>). The number of white pixels was counted for each column, and  
181 the arrest front was determined based on the definition of the point at which the ratio of  
182 white pixels was half that of the maximum and farthest from the blade base. The distance  
183 from the leaf base of each arrest front point was plotted for each condition in a box plot.  
184 Statistical analysis was performed using the R software.

185           Similarly, the arrest front position was determined as following; first, a series of  
186 z-stack images were stacked using ImageJ software. Stacked images with the outer side  
187 of the leaf were cropped and rotated so that the leaf base was on the left side of the image.  
188 The region with GFP fluorescence was extracted, and from this image, a binary image  
189 was created. The number of black pixels was counted in each column. The arrest front  
190 was determined based on the definition of the point at which the ratio of black pixels was  
191 half that of the maximum and farthest from the blade base. The distance from the leaf



192 base of each arrest front point was divided by the leaf length because of the size difference  
193 between lines. The obtained data were plotted for each condition in a box plot. Statistical  
194 analysis was performed using the R software.

195

#### 196 Observation of Aniline Blue signal

197 This method was derived from previous studies for the detection of newly  
198 formed cell walls (Kuwabara & Nagata, 2006; Kuwabara *et al.*, 2011). Leaf primordia (7  
199 DAS) of *A. thaliana gl1(glabra1)-s92f* and *gl1-s92flan3-4* mutants and Col-0 flower  
200 petals and sepals were first fixed in a mixture of ethanol and acetic acid (4:1, v/v) for 30  
201 min and then rinsed in 100% ethanol. Then, the samples were immersed in a mixture of  
202 ethanol and 100 mM phosphate buffer (pH 9.0; 1:1, v/v) for 30 min and then in 100 mM  
203 phosphate buffer (pH 9.0) for 10 min. Finally, the samples were immersed in a 0.02%  
204 (w/v) solution of aniline blue in 100 mM phosphate buffer (pH 9.0) for at least 7 days and  
205 up to 30 days at 4°C. Leaf primordia were mounted on slides with the staining solution  
206 and observed under a confocal microscope (FV10C-PSU; Olympus, Tokyo, Japan) under  
207 UV excitation with a DAPI (4',6-diamidino-2-phenylindole) filter. The data were  
208 analyzed by taking each angle of the septum wall. Calculations were performed using  
209 Microsoft® Excel.

210

#### 211 Observation of EdU-marked cells

212 We used the Click-iT EdU Alexa Fluor 488 Imaging Kit (Thermo Fischer  
213 Scientific, Waltham, MA, USA) to visualize the cells in S phase. We dissected the  
214 inflorescence of *A. thaliana* into several pieces and soaked the flower clusters into 10 µM  
215 5-ethynyl-2'-deoxyuridine (EdU) solution in 1/2 MS medium with 1% sucrose for 3 h

216 under  $\sim 45 \mu\text{mol m}^{-2} \text{s}^{-1}$  white fluorescent light. The samples were washed with PBS  
217 containing 0.1% Triton X-100 and fixed with FAA (37% [v/v] formaldehyde, 5% [v/v]  
218 acetic acid, 50% [v/v] ethanol) and stored at 4°C. Subsequent fluorescent labeling with  
219 Alexa Fluor 488 or 555 (Thermo Fischer Scientific, Waltham, MA, USA) was conducted  
220 according to the manufacturer's instructions. Floral organs were mounted on slides, and  
221 fluorescent dye signals conjugated to EdU were observed under fluorescent microscope  
222 (DM4000; Leica Microsystems GmbH, Wetzlar, Germany).

223

## 224 **Results**

### 225 Change in the length of cell proliferation zone

226 In the PATI-treated plants, the leaves were shorter and rounder than those of the  
227 control plants (Fig. **1D-F**, Fig. **2**). The leaf vein pattern also differed in PATI-treated  
228 leaves (Fig. **1D-F**, Fig. **2**); namely, the midvein was widened and bifurcated, the lateral  
229 veins ran parallel to each other, and the veins adjacent to leaf margins were also widened.  
230 These observations are consistent with those of previous reports (Mattsson *et al.*, 1999;  
231 Sieburth, 1999; Sawchuk *et al.*, 2013).

232 To investigate the effect of inhibition of PAT on the leaf meristem, the cell  
233 proliferation zone was observed in the leaf primordia of PATI-treated plants. The  
234 *CYCBI;1::GUS* line is used to visualize dividing G2-M phase cells (Donnelly *et al.*,  
235 1999). The first and second rosette leaves of 6-DAS seedlings for control plants and 7-  
236 day-old seedlings for PATI-treated plants were used for this experiment, considering the  
237 growth retardation observed in the PATI-treated plants.

238 In the PATI-treated plants, the cell proliferation zone remained in the proximal  
239 position, similar to the control plants (Fig. **1A-C**). The images were processed to further

240 examine the positioning of the cell proliferation zone (Fig. 3). We observed that both the  
241 length of the cell proliferation zone from the leaf base and the total ratio of cell  
242 proliferation zone to the total leaf length were found to be increased in PATI-treated leaves  
243 (Fig. 4).

244

#### 245 AN3 mRNA and AN3 protein localization in leaf primordia

246 To investigate how the length of the cell proliferation zone increased, we  
247 examined the localization of *AN3*, a positive regulator of cell proliferation. As *AN3*  
248 protein can move between cells, two lines, *an3-4/pAtAN3::AN3-GFP* and *an3-*  
249 *4/pAtAN3::AN3-3xGFP*, were used for the observation. The former can detect actual  
250 protein localization, whereas the latter is used to monitor mRNA localization because it  
251 represents accumulation of the protein without cell-to-cell movement ability (Kawade *et*  
252 *al.*, 2013, 2017). The first and second rosette leaves of 5 DAS seedlings were used for  
253 this experiment.

254 We observed that the overall localization of *AN3* under PATI treatment did not  
255 change from that of the control; it remained in the proximal region (Fig. 5). This confirms  
256 the observation in the cell proliferation zone described above. The *AN3*-expressing  
257 regions were also determined using the same image processing method used for the  
258 analysis of cell proliferation zone. As a result, the *AN3*-mRNA expressing regions were  
259 slightly longer in the PATI-treated leaves than in control; in NPA-treated leaves,  
260 significant differences were detected compared with that of the control. However, protein  
261 localization did not show a statistical difference between TIBA- and NPA-treated plants  
262 (Fig. 6). Therefore, even though changes in *AN3* mRNA expression pattern may influence  
263 the increase in length in the cell proliferation regions, the spatial gradient of *AN3* protein

264 along the longitudinal axis of leaf primordia did not change. Thus, the influence of PATI  
265 treatment on the AN3 protein accumulation pattern is rather limited.

266 In contrast, when *an3-4/pAtAN3::AN3-3xGFP* were treated with PATI, we  
267 recognized that *AN3* localization was missing in the vasculature region. This missing  
268 localization was also observed in control conditions, but in PATI-treated leaves, the  
269 vasculature was very thick, and therefore, the absence was recognizable (Fig. **1D-F**, Fig.  
270 **5**).

271

#### 272 Cell division angles in leaves

273 Based on the changes in the size or pattern of the cell proliferation zone, the  
274 observed leaf-shape change by PATI treatment could not be explained. Analysis of cell  
275 division angles was performed to further investigate how it affects organ shape under  
276 PATI treatment. We used the *gll-s92f* mutant and *gll-s92f/an3-4* double mutants for this  
277 experiment. We used *gll-s92f* mutants that lacked trichomes as a control, because  
278 trichomes obstruct cell division plane observation using aniline blue staining. The angles  
279 were determined against the proximal-distal axis, starting from the leaf base and parallel  
280 to the midvein for the first and second rosette leaves of 7 DAS seedlings (Fig. **8**; Fig. **S1**).

281 As a result, a variety of cell division angle patterns were observed (Fig. **7A, B**,  
282 Fig. **8**). In the control plants, the cell division angle occurred around 130°–140° (Fig. **7A**).  
283 In PATI-treated leaves, this peak was less evident, and cell division was likely to occur in  
284 all directions (Fig. **7A**). This may have contributed to changes in leaf shape, with rounder  
285 and shorter leaves, when treated with PATI (Fig. **1D-F**, Fig. **2**).

286 Cell division angle investigation was also performed in the *an3-4* mutant plants.  
287 In the *an3-4* mutant without PATI, the peak of cell division angle was around 140–150°,

288 which differed from that of the control condition (Fig. 7A, B), suggesting that AN3 might  
289 shift the cell division angle to smaller angles, that is, a shift from proximo-distal to medio-  
290 lateral direction. In the *an3* mutant treated with PATI, however, the distribution of cell  
291 division angle became similar to that of WT plants treated with PATI (Fig. 7A, B). This  
292 suggests that the randomizing effect of PATI on cell division angle is superior to that of  
293 the *an3* genotype of the plant biasing cell division angle to the proximo-distal axis. In  
294 addition, there was a specific pattern change in the cell division angle of each PATI type  
295 (TIBA and NPA).

296

#### 297 The position of cell proliferative area in floral organs

298 Although floral organs such as sepals, petals, stamens, and carpels are homeotic  
299 to leaves, their shapes are absolutely different. Even between sepals and petals, both of  
300 which are planar organs, there are distinct differences in shape in *A. thaliana*. In the distal  
301 part, the sepal is narrower, and the petal is wider. In this aspect, foliage leaves are  
302 narrower in the distal part, similar to sepals.

303 We observed cell proliferation patterns in floral organ primordia to investigate  
304 whether these patterns might influence the difference in the final organ shape. To visualize  
305 dividing cells in floral organs, we used EdU. In a sepal, cell division was observed in the  
306 basal part of the organ primordia through the observed developmental stages (Fig. 10),  
307 which resembled to that in leaves. In contrast, cell division in the petal primordia was  
308 observed in whole organ when the organ was around 100–150  $\mu\text{m}$  in length, and the distal  
309 and marginal regions when the organ was around 400  $\mu\text{m}$  in length (Fig. 10), which  
310 marked a clear difference from that of leaves and sepals. A similar tendency was also  
311 observed in the aniline-blue-stained samples (Fig. 9).

312

### 313 AN3 protein localization in floral organs

314           As AN3 is a key regulator of the leaf meristem position, and it promotes the cell  
315 division of petals and sepals, we suspected that AN3 protein accumulation patterns may  
316 be different between them, which have different positions of the cell proliferative area.  
317 AN3-GFP signals were only observed in the basal part of sepal organ primordia, whereas  
318 the signals were observed in the distal region through the observed developmental stages  
319 in petal organ primordia. Moreover, in terms of petal primordia, sparse signals were also  
320 observed in the central region and the basal part in the later stage 9 (Fig. 10), where EdU  
321 signals were rarely observed.

322

### 323 Phenotype of *an3* mutant in sepal

324           It is reported that *an3* mutants have narrower petals and lesser number of cells  
325 than that of the WT (Horiguchi *et al.*, 2005; Lee *et al.*, 2009a); the sepal phenotype has  
326 not been investigated. In order to investigate whether AN3 maintains leaf meristem in  
327 sepal primordia, which was suggested by the AN3 protein accumulation pattern and  
328 proliferative area, we compared the phenotype of *an3-4* and the WT in the sepals (Fig.  
329 **11A–B**). The area of the organ was smaller in *an3* than in the WT (Fig. **11C**), and we also  
330 observed that the *an3* mutant had less complex veins as compared to that of the WT,  
331 which was evaluated based on the number of secondary and higher veins in the m-shaped  
332 or two n-shaped primary veins (Fig. **11C, D**).

333

### 334 Cell division angles in floral organs

335 To observe the influence of cell division angle on the final shape of floral organs,  
336 cell division angle analysis was conducted in the sepals and petals. Flowers at stages 8–  
337 10 were used in this experiment to observe active cell proliferation (Alvarez-Buylla *et al.*,  
338 2010).

339 The cell division angle in floral organs peaked at approximately 60°–90° and  
340 140°–180° (Fig. 8). This twin peak pattern is different from the cell division angle in  
341 leaves, which only had one peak (Fig. 7A, B). Because sepals and leaves had similar  
342 localization of the cell proliferation zone, we expected that the distribution of cell-  
343 division angles would be similar, but on the contrary, the overall tendency of cell division  
344 in sepals was similar to that of petals. This suggests that the pattern of cell division angles  
345 is not associated with the localization of the cell proliferation zone but with organ identity.

346 The cell divisions with the 60°–90° peak, which were divisions in the  
347 mediolateral direction of the primordia, were identified mostly in the central regions of  
348 the petal primordia. In contrast, the divisions that corresponded to the 140°–180° peak,  
349 which were divisions in the proximo-distal direction, were identified mostly in the  
350 marginal regions of the petal primordia (Fig. 9).

351

### 352 **Discussion**

353 In this study, we examined how cell proliferative zones differ in the primordia  
354 of PATI-treated leaves and floral organs from normal foliage leaf primordia of *A. thaliana*  
355 with focus on the spatial expression pattern of *AN3*, a key element for leaf meristem  
356 positioning (Kawade *et al.*, 2010). As a result, we revealed that organ shape change by  
357 PATI treatment cannot be attributed to changes in leaf-meristem positioning, size of the

358 leaf meristem, or the expression pattern of *AN3* and is rather attributed to altered cell  
359 division angles in the leaf meristem. In contrast, different shapes of sepals and petals  
360 compared with foliage leaves were found to be correlated with both altered meristem  
361 position associated with altered *AN3* expression patterns and different distributions of cell  
362 division angles. These results strongly indicate that lateral organ shapes are regulated via  
363 two aspects: position of meristem and cell division angles; the former is mainly governed  
364 by the *AN3* expression pattern. In the following sections, several aspects of the above  
365 findings are discussed.

366

#### 367 The position of leaf meristem in PATI-treated plants

368         When *A. thaliana* plants were treated with PATI, the cell proliferation zone in  
369 leaf primordia did not show any changes in terms of localization. However, both the  
370 length of the cell proliferation zone in leaf primordia and the ratio of the cell proliferation  
371 zone occupying the primordia were observed to be increased (Fig. 4). As previously  
372 reported (Sieburth, 1999), PATI-treated leaves were rounder and shorter, whereas a longer  
373 proliferation zone would be expected to produce a longer leaf. Instead, changes in the cell  
374 division angles could be attributed to the altered leaf shape.

375         In this study, it was observed that even when PAT was inhibited, there was no  
376 change in the basal expression pattern of *AN3* (Fig. 5). The *AN3* mRNA expression zone  
377 was slightly expanded to the distal direction in the expression zone ratio, although the  
378 actual length was not significantly different (Fig. 6). Indeed, the final AN3 protein  
379 distribution remained unchanged under PATI treatment (Fig. 6). Moreover, the results for  
380 NPA and TIBA showed the different trend; while TIBA increased the mRNA localization  
381 zone and protein localization of AN3, NPA increased *AN3* mRNA localization zone but



382 did not affect protein localization of AN3. In either case, *AN3* mRNA expression and AN3  
383 protein diffusion were not regulated by auxin.

384 We also observed that *AN3* was not expressed in leaf veins (Fig. 5). This trend  
385 was seen in PATI-treated leaves as well as in control conditions; however, it was not  
386 evident because the veins in control conditions were much thinner than those of PATI-  
387 treated leaves (Fig. 1D-F). This may happen if *AN3* expression is shut down in  
388 differentiated vascular cells, which may imply that the vasculature differentiation by  
389 auxin is superior to cell proliferation maintenance by AN3.

390

#### 391 Cell division angle and leaf shape

392 A longer proliferation zone is expected to make a longer leaf; however, in PATI  
393 treatment, it produced shorter leaves. The cell division is also an important factor in both  
394 leaf development and leaf vein architecture (Kang *et al.*, 2007). In this study, analysis of  
395 the cell division angle revealed that the pattern differed between PATI-treated plants (Fig.  
396 7A). This difference in the pattern could be a cause for the differences in leaf shape.  
397 Namely, in comparison with control leaf primordia that had major division angles in  
398 130°–140°, PATI-treated leaf primordia had dispersed division angles in many directions,  
399 forming a round and short leaf, which matched the phenotype (Fig. 1D-F, Fig. 3). We  
400 observed the *an3* mutant tended to divide around 140°–150°, which partially explains the  
401 narrow leaf phenotype of *an3* mutants, as cell division along the proximal-distal axis was  
402 increased.

403

#### 404 Determining cell division angle in leaves

405           In this study, there were two components that changed the cell division angle:  
406 PAT and AN3. When PAT was inhibited, the peak in the cell division angle distribution  
407 became less evident (Fig. **7A**). As auxin flow controls vascular cell polarity (Linh *et al.*,  
408 2018), and plays a role in cell division angle (Yin & Tsukaya, 2016), it is possible that the  
409 cells divide in the direction of auxin flow. In contrast, both NPA and TIBA affect actin  
410 dynamics (Teale & Palme, 2018; Zou *et al.*, 2019) that can affect cytoskeletal regulation  
411 of cytokinesis, and may be one of the underlying reasons for the change in cell division  
412 angle.

413           Additionally, in the *an3* mutant, cell division along the proximal-distal axis  
414 accounted for a larger proportion of cells than that in the WT (Fig. **7B**). The increase in  
415 cell division along the proximal-distal axis may be due to changes in the overall direction  
416 of cell division during leaf development. In a previous report, the phase of cell division  
417 was divided into two phases: the first has more divisions along the proximal-distal axis  
418 than the second phase (Horiguchi *et al.*, 2011). Furthermore, in *an3* mutants, the transition  
419 from the first to the second phase does not occur before the termination of cell division  
420 activity (Horiguchi *et al.*, 2011). The shift in the peak of the cell division angle observed  
421 in the *an3* mutant reflects this failure in shifting to the second phase of cell proliferation,  
422 which confirms the results of previous studies. Therefore, AN3 functions in the transition  
423 to second phase of cell division, and as a result, cells divide along the proximal-distal axis  
424 in the absence of AN3. More precisely, AN3 might promote the shift of the cell division  
425 angle from the proximo-distal to medio-lateral direction.

426           In addition, in *an3* mutants treated with PATI, the cell division angles were  
427 similar to those of WT treated with PATI (Fig. **7A, B**). This suggests that the randomizing

428 effect of PAT1 on cell division angle is superior to that of AN3 and that the loss of PAT  
429 results in cell division in random directions irrespective of the presence or absence of  
430 AN3.

431

#### 432 Position of meristematic tissue determines the final floral organ shape

433 The final organ shape is determined by various factors, such as acceleration and  
434 deceleration of proliferation, oriented cell division and expansion, and the meristem  
435 position (Tsukaya, 2018). In this study, we showed that the position of the cell  
436 proliferative area was completely different between sepals and petals, which are  
437 morphologically different. The petal of *A. thaliana* with a modest fan shape has a  
438 proliferative region in the distal part, which is similar to ferns with fan-shaped  
439 morphology that is rare in angiosperm leaves, coinciding with leaf meristem at the apical  
440 margin (Boyce, 2007; Tsukaya, 2014, 2018). This suggests that the morphological  
441 differences between sepals and petals could be partly explained by the meristematic  
442 position in each organ.

443 Although predominant cell division occurs in submarginal plate meristem to  
444 widen the leaf blade area in leaf primordia (e.g., Poethig and Sussex, 1985), it was also  
445 shown that marginal meristem residing in the margin of the primordia also exists (Alvarez  
446 *et al.*, 2016). Alvarez *et al.* (2016) showed that when NGATHA and CINCINNATA-class-  
447 TCP were knocked down, indeterminate marginal growth occurred in the entire margin  
448 of the leaf blade, suggesting potential meristem activity in this area. Interestingly,  
449 marginal growth occurs only in the distal region of floral organs, including sepals and  
450 petals. Although in our experiments, active cell division occurred in the proximal part of  
451 the sepal primordia, it is possible that the potential marginal meristem in the distal part

452 also contributes to the elaborate final shape of the sepal (Floyd & Bowman, 2010). In  
453 terms of petals, active cell division occurs in the distal margin in the first place; therefore,  
454 the marginal meristem may contribute more than leaves or sepals. Since the activity of  
455 meristem in the distal marginal area of a blade has been discussed as an ancestral character  
456 (Floyd & Bowman, 2010), petals may retain this developmental character (Boyce, 2007).  
457 We observed EdU signals in the entire margin of the petal primordia at least until the  
458 organ size was 400  $\mu\text{m}$  in length, even in the proximal region. Considering the results of  
459 Alvarez et al. (2016) on leaf primordia, the nature of proliferative cells in marginal areas  
460 is different among different organs.

461

#### 462 Determining factors for the meristematic position

463 Several key genes are known to positively control cell proliferation in the leaf  
464 meristem (Nakata *et al.*, 2012; Ichihashi & Tsukaya, 2015). Among them, the AN3-  
465 protein-accumulated region matches well with the cell proliferative area in leaf primordia  
466 (Kawade *et al.*, 2017), suggesting that AN3 is an important determinant of the leaf  
467 meristem position. Moreover, the smaller size of a petal in *an3* or triple knockdown of  
468 the GIF family (Kim & Kende, 2004; Horiguchi *et al.*, 2005; Lee *et al.*, 2009a) suggested  
469 that AN3 is also involved in the promotion of cell proliferation in the petal. However, its  
470 functioning zone in primordia has not been well investigated. In this study, we showed  
471 that AN3-expressed region overlapped well with the cell proliferative area in both sepals  
472 and petals, as observed in leaf primordia. In addition, we first showed that sepals in *an3*  
473 mutants are likely to have a smaller number of cells as petals or foliage leaves. These  
474 results strongly suggest that AN3 functions as a determinant of the meristematic position  
475 and activity in floral organs. In the past, JAGGED (JAG) was examined as a candidate

476 of a regulatory gene for the specific morphology in the Arabidopsis petal differed from  
477 leaves, from the following points: the loss-of-function *jag* mutant has narrower and  
478 shorter petals, the *JAG* over-expressor has larger petals; its mRNA is expressed distal  
479 margin (Sauret-Güeto et al. 2013). At that time point *JAG* was the only one candidate  
480 ‘organizer’ that gives the petal with a pattern of growth orientations that fans out. But  
481 now *AN3* became to be an additional candidate that fulfils the required, above-mentioned  
482 conditions. Indeed *AN3* was identified as a direct target of *JAG* (Schiessl et al. 2014). The  
483 role of *AN3* as the ‘organizer’ should be examined carefully in the future.

484         However, in terms of petal primordia, *AN3* protein signals were also observed  
485 in the less proliferative area. This might be due to a lack of associating transcriptional  
486 factors such as GROWTH REGULATING FACTOR5 (*GRF5*), which is necessary to  
487 promote cell proliferation in leaf primordia (Horiguchi et al., 2005), in such regions.  
488 Alternatively, because signals in the proximal part were not as strong as those in the distal  
489 region, the concentration of *AN3* proteins might not be enough to promote cell division  
490 to the extent that EdU was incorporated.

491         The regulation of meristem position floral organ identity genes needs to be  
492 investigated (Coen and Meyerowitz, 1991). Honma and Goto (2001) and Pelaz et al.  
493 (2001) revealed that when A genes (*APELATA1*) and B genes (*APELATA3* and  
494 *PISTILATA*) were ectopically expressed together with *SEPALLATA2/3* in rosette leaves,  
495 the rosette leaves obtained petal identity, and the color and cell shape became petal-like.  
496 However, the overall organ shape has not yet been investigated in detail. From our results,  
497 the transformed organ is not fan-shaped, but has a taper off shape, which is similar to  
498 rosette leaves, cauline leaves, and sepals. This suggests that factors other than the floral

499 identity homeotic genes control the final organ shape. Revealing the mechanisms of *AN3*  
500 expression control might shed light on this possibility.

501           The leaves of some gymnosperms and ferns are considered to grow from the  
502 meristem in the distal margin. The positioning of these meristems may also be  
503 determined by the spatial distribution of leaf meristem-controlling genes such as  
504 *AN3/GIF1*. As *GIF* family genes exist in most eukaryotic organisms, including the basal  
505 land plants, *Marchantia polymorpha*, *Physcomitrium patens*, and *Sellaginella*  
506 *moellendorffi* (Kim and Tsukaya, 2015), further analyses of the *GIFs* in gymnosperms  
507 and ferns will answer this question.

508

#### 509 Determining cell division angle in floral organs

510           In this study, the cell division pattern in floral organ primordia was investigated  
511 for its possible roles in each floral organ morphology, and both the petals and sepals  
512 showed a pattern with twin peaks in the distribution of cell division angles, which was  
513 different from that of leaf primordia that had only a single peak (Fig. 8). Although both  
514 sepal and leaf primordia have a cell proliferation zone in the basal region, the cell division  
515 angle was controlled differently, which may imply that cell division angles depend on  
516 organ identity and affect their final shapes.

517           In the petal, the cell division occurred at 60°–90° angle in the central regions,  
518 and the cell division with the 140°–180° angle was mostly in the marginal regions,  
519 whereas such a pattern was not seen in the sepals (Fig. 9). This difference may cause  
520 differences in shape between sepals and petals, and petal shape, with the distal part being  
521 wider than the proximal part, may be caused by the cell divisions that contribute to width  
522 in the marginal regions. Thus, we revealed that lateral organ shapes are regulated by two

523 factors: the position of the cell proliferative zone governed by the spatial expression  
524 pattern of *AN3* and cell division angles. Even in one species, by changing these two  
525 factors, a variety of lateral organ shapes could be realized.

526

## 527 **Acknowledgments**

528 We would like to thank MEXT and the Graduate Program for Leaders in Life Innovation  
529 (GPLLI)/World-leading Innovative Graduate Study Program for Life Science and  
530 Technology (WINGS-LST) of the University of Tokyo for providing microscope facilities.

531

## 532 **Author Contributions**

533 AK, MN, and HT designed the experiments; AK and MN performed the experiments and  
534 analyzed the data; AK, MN, and HT wrote the manuscript.

535

## 536 **Funding**

537 This research was supported by a Grant-in-Aid for JSPS Fellows (AK, #19J14140) and a  
538 Grant-in-Aid for Scientific Research on Innovation Areas (HT, #25113002 and  
539 19H05672) from MEXT and GPLLI/WINGS-LST of the University of Tokyo (AK).

540

## 541 **Conflict of Interest**

542 No conflict of interest.

543

## 544 **Data Availability**

545 Data available on request from the authors.

546

547

548 **References**

- 549 **Alvarez-Buylla ER, Benítez M, Corvera-Poiré A, Chaos Cador Á, de Folter S,**  
550 **Gamboa de Buen A, Garay-Arroyo A, García-Ponce B, Jaimes-Miranda F, Pérez-**  
551 **Ruiz R V., et al. 2010.** Flower Development. *The Arabidopsis Book* **8**: e0127.
- 552 **Alvarez JP, Furumizu C, Efroni I, Eshed Y, Bowman JL. 2016.** Active suppression  
553 of a leaf meristem orchestrates determinate leaf growth. *eLife* **5**: e15023.
- 554 **Anastasiou E, Kenz S, Gerstung M, MacLean D, Timmer J, Fleck C, Lenhard M.**  
555 **2007.** Control of plant organ size by KLUH/CYP78A5-dependent intercellular  
556 signaling. *Developmental Cell* **13**: 843–856.
- 557 **Boyce CK. 2007.** Mechanisms of laminar growth in morphologically convergent leaves  
558 and flower petals. *International Journal of Plant Sciences* **168**: 1151–1156.
- 559 **Candela H, Martínez-Laborda A, Luis Micol J. 1999.** Venation pattern formation in  
560 *Arabidopsis thaliana* vegetative leaves. *Developmental Biology* **205**: 205–216.
- 561 **Cheng Y, Dai X, Zhao Y. 2006.** Auxin biosynthesis by the YUCCA flavin  
562 monooxygenases controls the formation of floral organs and vascular tissues in  
563 *Arabidopsis*. *Genes and Development* **20**: 1790–1799.
- 564 **Coen ES, Meyerowitz EM. 1991.** The war of the whorls: genetic interactions  
565 controlling flower development. *Nature* **353**: 31–37.
- 566 **Dengler N, Kang J. 2001.** Vascular patterning and leaf shape. *Current Opinion in*  
567 *Plant Biology* **4**: 50–56.
- 568 **Disch S, Anastasiou E, Sharma VK, Laux T, Fletcher JC, Lenhard M. 2006.** The  
569 E3 ubiquitin ligase BIG BROTHER controls *Arabidopsis* organ size in a dosage-  
570 dependent manner. *Current Biology* **16**: 272–279.



- 571 **Donnelly PM, Bonetta D, Tsukaya H, Dengler RE, Dengler NG. 1999.** Cell cycling  
572 and cell enlargement in developing leaves of *Arabidopsis*. *Developmental Biology* **215**:  
573 407–419.
- 574 **Esau K. 1977.** *Anatomy of Seed Plants, 2nd Edition*. New York: John Wiley & Sons.
- 575 **Floyd SK, Bowman JL. 2010.** Gene expression patterns in seed plant shoot meristems  
576 and leaves: Homoplasmy or homology? *Journal of Plant Research* **123**: 43–55.
- 577 **Horiguchi G, Kim GT, Tsukaya H. 2005.** The transcription factor AtGRF5 and the  
578 transcription coactivator AN3 regulate cell proliferation in leaf primordia of  
579 *Arabidopsis thaliana*. *Plant Journal* **43**: 68–78.
- 580 **Horiguchi G, Nakayama H, Ishikawa N, Kubo M, Demura T, Fukuda H, Tsukaya**  
581 **H. 2011.** *ANGUSTIFOLIA3* plays roles in adaxial/abaxial patterning and growth in leaf  
582 morphogenesis. *Plant and Cell Physiology* **52**: 112–124.
- 583 **Ichihashi Y, Kawade K, Usami T, Horiguchi G, Takahashi T, Tsukaya H. 2011.**  
584 Key proliferative activity in the junction between the leaf blade and leaf petiole of  
585 *Arabidopsis*. *Plant Physiology* **157**: 1151–1162.
- 586 **Ichihashi Y, Tsukaya H. 2015.** Behavior of leaf meristems and their modification.  
587 *Frontiers in Plant Science* **6**: 1–8.
- 588 **Ikeuchi M, Yamaguchi T, Kazama T, Ito T, Horiguchi G, Tsukaya H. 2011.**  
589 *ROTUNDIFOLIA4* regulates cell proliferation along the body axis in *Arabidopsis* shoot.  
590 *Plant and Cell Physiology* **52**: 59–69.
- 591 **Kang J, Mizukami Y, Wang H, Fowke L, Dengler NG. 2007.** Modification of cell  
592 proliferation patterns alters leaf vein architecture in *Arabidopsis thaliana*. *Planta* **226**:  
593 1207–1218.

- 594 **Kawade K, Horiguchi G, Tsukaya H. 2010.** Non-cell-autonomously coordinated  
595 organ size regulation in leaf development. *Development* **137**: 4221–4227.
- 596 **Kawade K, Horiguchi G, Usami T, Hirai MY, Tsukaya H. 2013.** ANGUSTIFOLIA3  
597 signaling coordinates proliferation between clonally distinct cells in leaves. *Current*  
598 *Biology* **23**: 788–792.
- 599 **Kawade K, Tanimoto H, Horiguchi G, Tsukaya H. 2017.** Spatially different tissue-  
600 scale diffusivity shapes ANGUSTIFOLIA3 gradient in growing leaves. *Biophysical*  
601 *Journal* **113**: 1109–1120.
- 602 **Kazama T, Ichihashi Y, Murata S, Tsukaya H. 2010.** The mechanism of cell cycle  
603 arrest front progression explained by a *KLUH/CYP78A5*-dependent mobile growth  
604 factor in developing leaves of *Arabidopsis thaliana*. *Plant and Cell Physiology* **51**:  
605 1046–1054.
- 606 **Kim JH, Kende H. 2004.** A transcriptional coactivator, AtGIF1, is involved in  
607 regulating leaf growth and morphology in *Arabidopsis*. *Proceedings of the National*  
608 *Academy of Sciences of the United States of America* **101**: 13374–13379.
- 609 **Kuwabara A, Backhaus A, Malinowski R, Bauch M, Hunt L, Nagata T, Monk N,**  
610 **Sanguinetti G, Fleming A. 2011.** A shift toward smaller cell size via manipulation of  
611 cell cycle gene expression acts to smoothen arabidopsis Leaf Shape. *Plant Physiology*  
612 **224**: 761–770.
- 613 **Kuwabara A, Nagata T. 2006.** Cellular basis of developmental plasticity observed in  
614 heterophyllous leaf formation of *Ludwigia arcuata* (Onagraceae). *Planta* **224**: 761–770.
- 615 **Lee BH, Ko JH, Lee S, Lee Y, Pak JH, Kim JH. 2009a.** The *Arabidopsis GRF*-  
616 *INTERACTING FACTOR* gene family performs an overlapping function in determining

617 organ size as well as multiple developmental properties. *Plant Physiology* **151**: 655–  
618 668.

619 **Lee BH, Ko JH, Lee S, Lee Y, Pak JH, Kim JH. 2009b.** The Arabidopsis GRF-  
620 Interacting Factor gene family performs an overlapping function in determining organ  
621 size as well as multiple. *Plant Physiology* **151**: 655–668.

622 **Lee BH, Wynn AN, Franks RG, Hwang Y sic, Lim J, Kim JH. 2014.** The  
623 arabidopsis thaliana GRF-interacting factor gene family plays an essential role in  
624 control of male and female reproductive development. *Developmental Biology* **386**: 12–  
625 24.

626 **Linh NM, Verna C, Scarpella E. 2018.** Coordination of cell polarity and the  
627 patterning of leaf vein networks. *Current Opinion in Plant Biology* **41**: 116–124.

628 **Mattsson J, Sung ZR, Berleth T. 1999.** Responses of plant vascular systems to auxin  
629 transport inhibition. *Development* **126**: 2979–2991.

630 **Nakata M, Matsumoto N, Tsugeki R, Rikirsch E, Laux T, Okada K. 2012.** Roles of  
631 the middle domain-specific *WUSCHEL-RELATED HOMEODOMAIN* genes in early  
632 development of leaves in *Arabidopsis*. *Plant Cell* **24**: 519–535.

633 **Nelissen H, Eeckhout D, Demuyneck K, Persiau G, Walton A, van Bel M, Vervoort  
634 M, Candaele J, De Block J, Aesaert S, et al. 2015.** Dynamic changes in  
635 ANGUSTIFOLIA3 complex composition reveal a growth regulatory mechanism in the  
636 maize leaf. *Plant Cell* **27**: 1605–1619.

637 **Okada K, Ueda J, Komaki MK, Bell CJ, Shimura Y. 1991.** Requirement of the auxin  
638 polar transport system in early stages of *Arabidopsis* floral bud formation. *The Plant  
639 Cell* **3**: 677–684.

- 640 **Pelaz S, Gustafson-Brown C, Kohalmi SE, Crosby WL, Yanofsky MF. 2001.**  
641 *APETALA1* and *SEPALLATA3* interact to promote flower development. *The Plant*  
642 *Journal* **26**: 385–394.
- 643 **Poethig RS, Sussex IM. 1985.** The cellular parameters of leaf development in tobacco:  
644 a clonal analysis. *Planta* **165**: 170–184.
- 645 **Sawchuk MG, Edgar A, Scarpella E. 2013.** Patterning of leaf vein networks by  
646 convergent auxin transport pathways. *PLoS Genetics* **9**: e1003294.
- 647 **Sieburth LE. 1999.** Auxin is required for leaf vein pattern in *Arabidopsis*. *Plant*  
648 *Physiology* **121**: 1179–1190.
- 649 **Teale W, Palme K. 2018.** Naphthylphthalamic acid and the mechanism of polar auxin  
650 transport. *Journal of Experimental Botany* **69**: 303–312.
- 651 **Tsuge T, Tsukaya H, Uchimiya H. 1996.** Two independent and polarized processes of  
652 cell elongation regulate leaf blade expansion in *Arabidopsis thaliana* (L) Heynh.  
653 *Development* **122**: 1589–1600.
- 654 **Tsukaya H. 2014.** Comparative leaf development in angiosperms. *Current Opinion in*  
655 *Plant Biology* **17**: 103–109.
- 656 **Tsukaya H. 2018.** Leaf shape diversity with an emphasis on leaf contour variation,  
657 developmental background, and adaptation. *Seminars in Cell and Developmental*  
658 *Biology* **79**: 48–57.
- 659 **Verna C, Ravichandran SJ, Sawchuk MG, Linh NM, Scarpella E. 2019.**  
660 Coordination of tissue cell polarity by auxin transport and signaling. *eLife* **8**: e51061.
- 661 **Yin X, Tsukaya H. 2016.** A pulse-chase strategy for EdU labelling assay is able to  
662 rapidly quantify cell division orientation. *The New phytologist* **211**: 1462–1469.

663 **Zou M, Ren H, Li J. 2019.** An auxin transport inhibitor targets villin-mediated actin

664 dynamics to regulate polar auxin transport. *Plant Physiology* **181**: 161–178.

665

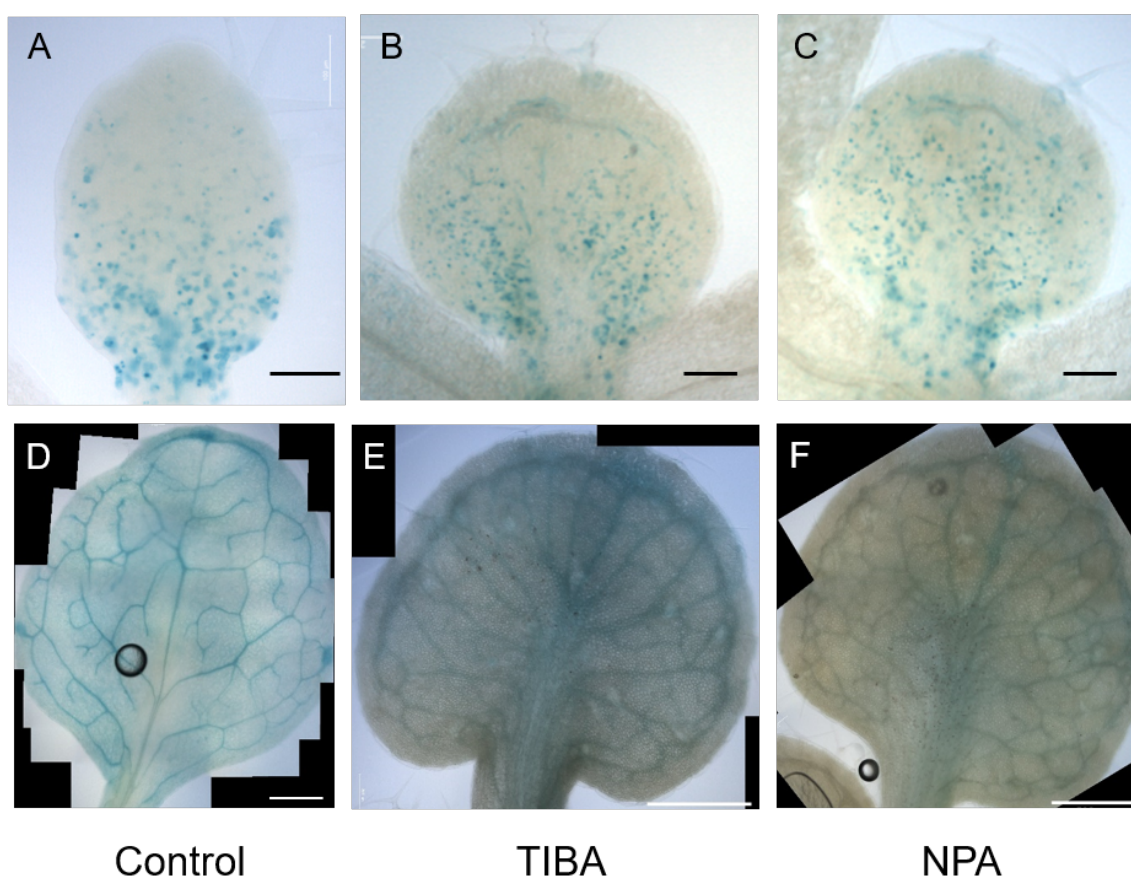

666

667 **Fig. 1** Cell proliferation is visualized by GUS staining in PATI-treated *CYCB1;1::GUS*.

668 A: 6 DAS control, B: 7 DAS TIBA-treated, C: 7 DAS NPA-treated leaf primordia.

669 D: 12 DAS control, E: 12 DAS TIBA-treated, F: 12 DAS NPA-treated leaf primordia.

670 Leaf primordia of similar length were compared.

671 Scale bars: A: 100  $\mu\text{m}$ , B, C: 200  $\mu\text{m}$ , D-F: 500  $\mu\text{m}$

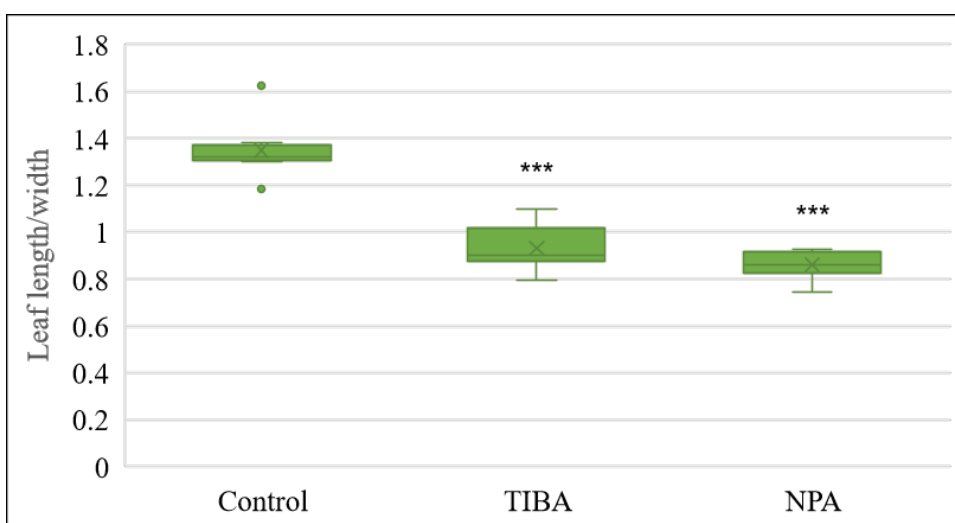

672

673 **Fig. 2** Leaf length/width ratio of leaf primordia at cell proliferation stage.

674 From left to right, data on control, TIBA-treated, and NPA-treated leaf primordia are

675 shown, n = 4, Dunnett's test \*\*\*:  $p < 0.001$

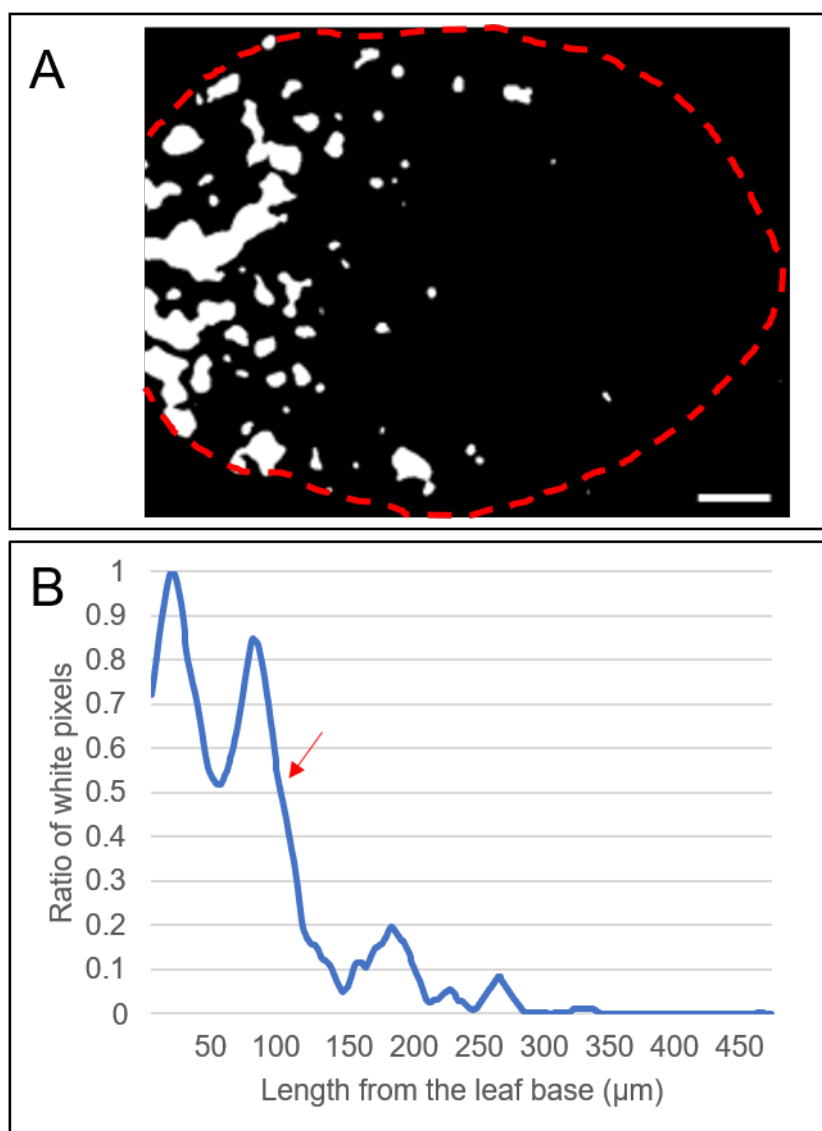

676

677 **Fig. 3** Determination of cell proliferation zone.

678 A: Binary images of GUS-stained leaf primordia. Scale bar: 50  $\mu\text{m}$

679 B: The ratio of white pixels from a binary image was calculated, and the length of the cell

680 proliferation zone (more than 50% of the white pixels) was determined. The red arrow

681 indicates the end of the cell proliferation zone.



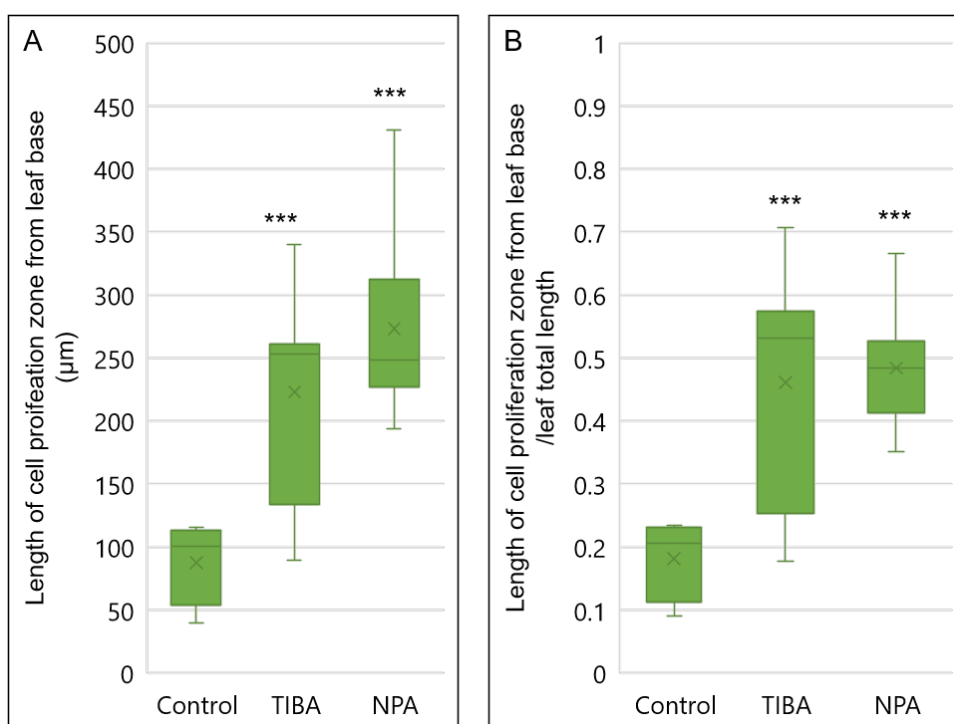

682

683 **Fig. 4** Length and the ratio of cell proliferation occupying leaf primordia.

684 A: Length of cell proliferation zone from leaf base

685 B: The ratio of cell proliferation zone to the total leaf length.

686 n = 8, Dunnett's test, \*\*\*:  $p < 0.001$

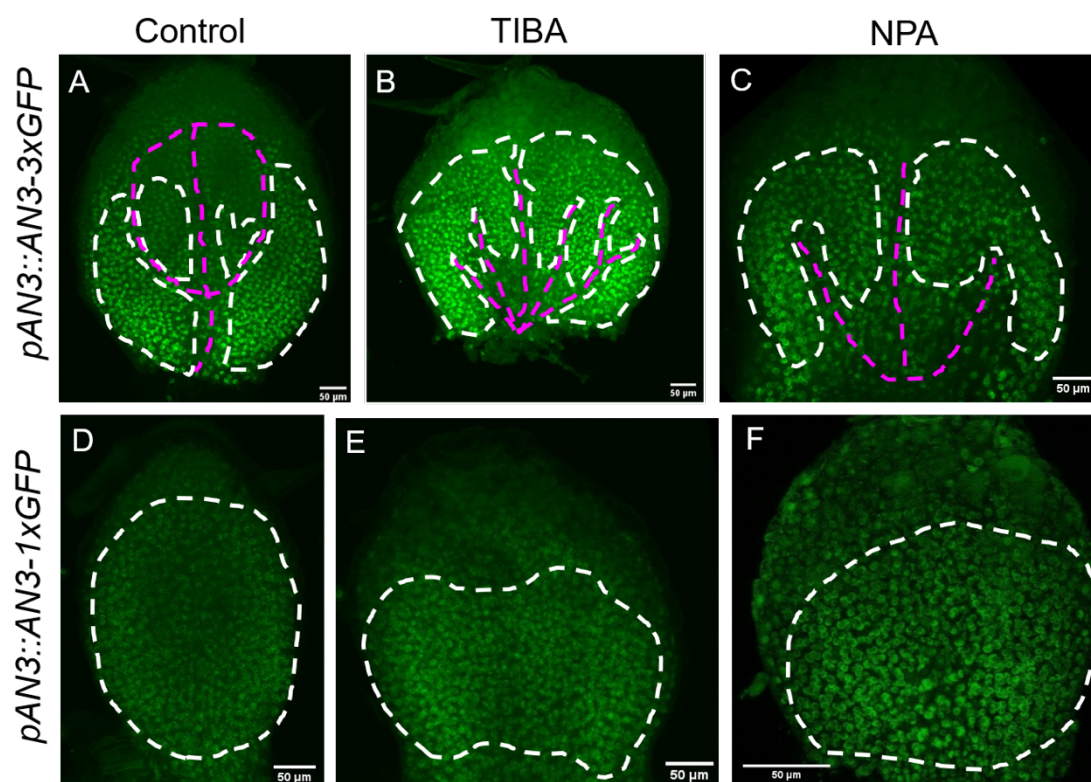

687

688 **Fig. 5** GFP localization of *an3/pAtAN3::AN3-3xGFP* (A-C) and *an3/pAtAN3::AN3-GFP*

689 (D-F).

690 Control (A, D), TIBA-treated (B, E), and NPA-treated (C, F) leaf primordia are shown.

691 White dotted lines indicate GFP-localized area, and magenta lines indicate vasculature.

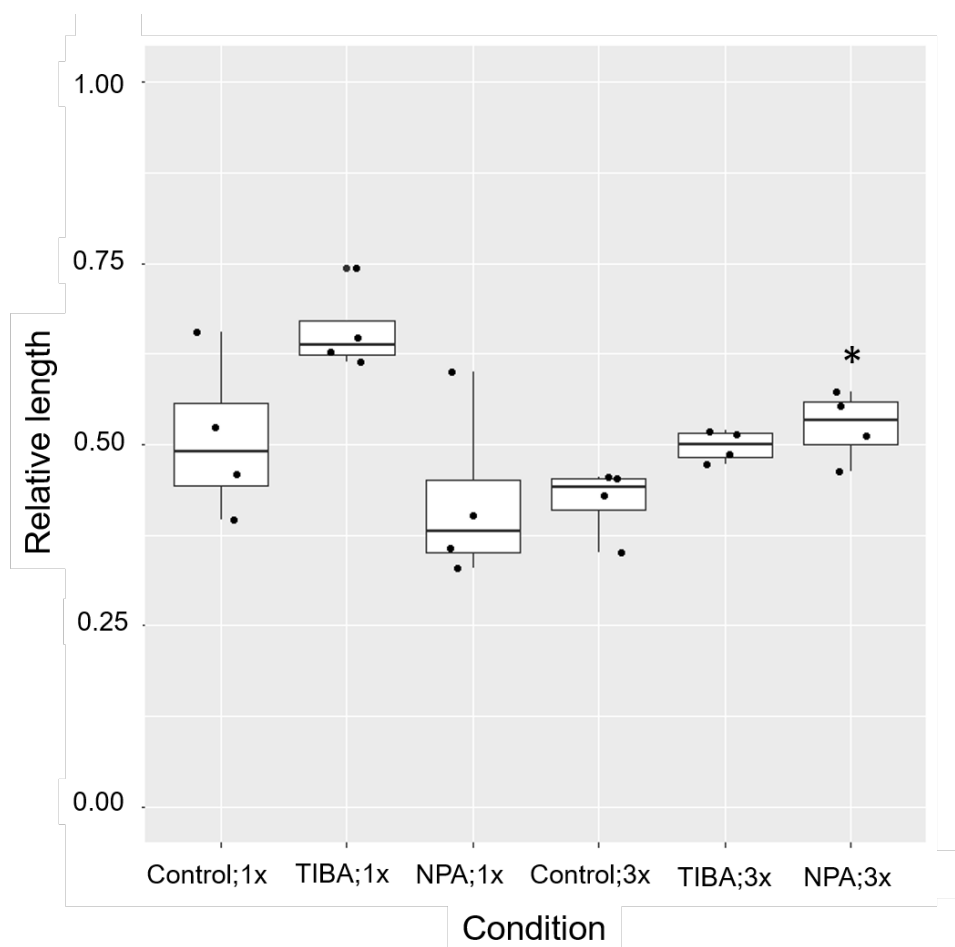

692

693 **Fig. 6** Ratio of AN3 mRNA and protein-localized area to the total length of leaf primordia.

694 From left, *an3/pAtAN3::AN3-GFP* Control, TIBA and NPA; *an3/pAtAN3::AN3-3xGFP*

695 Control, TIBA and NPA. n = 4, Dunnett's test, \*:  $p < 0.05$ . No mark implies no statistically

696 significant difference was observed.

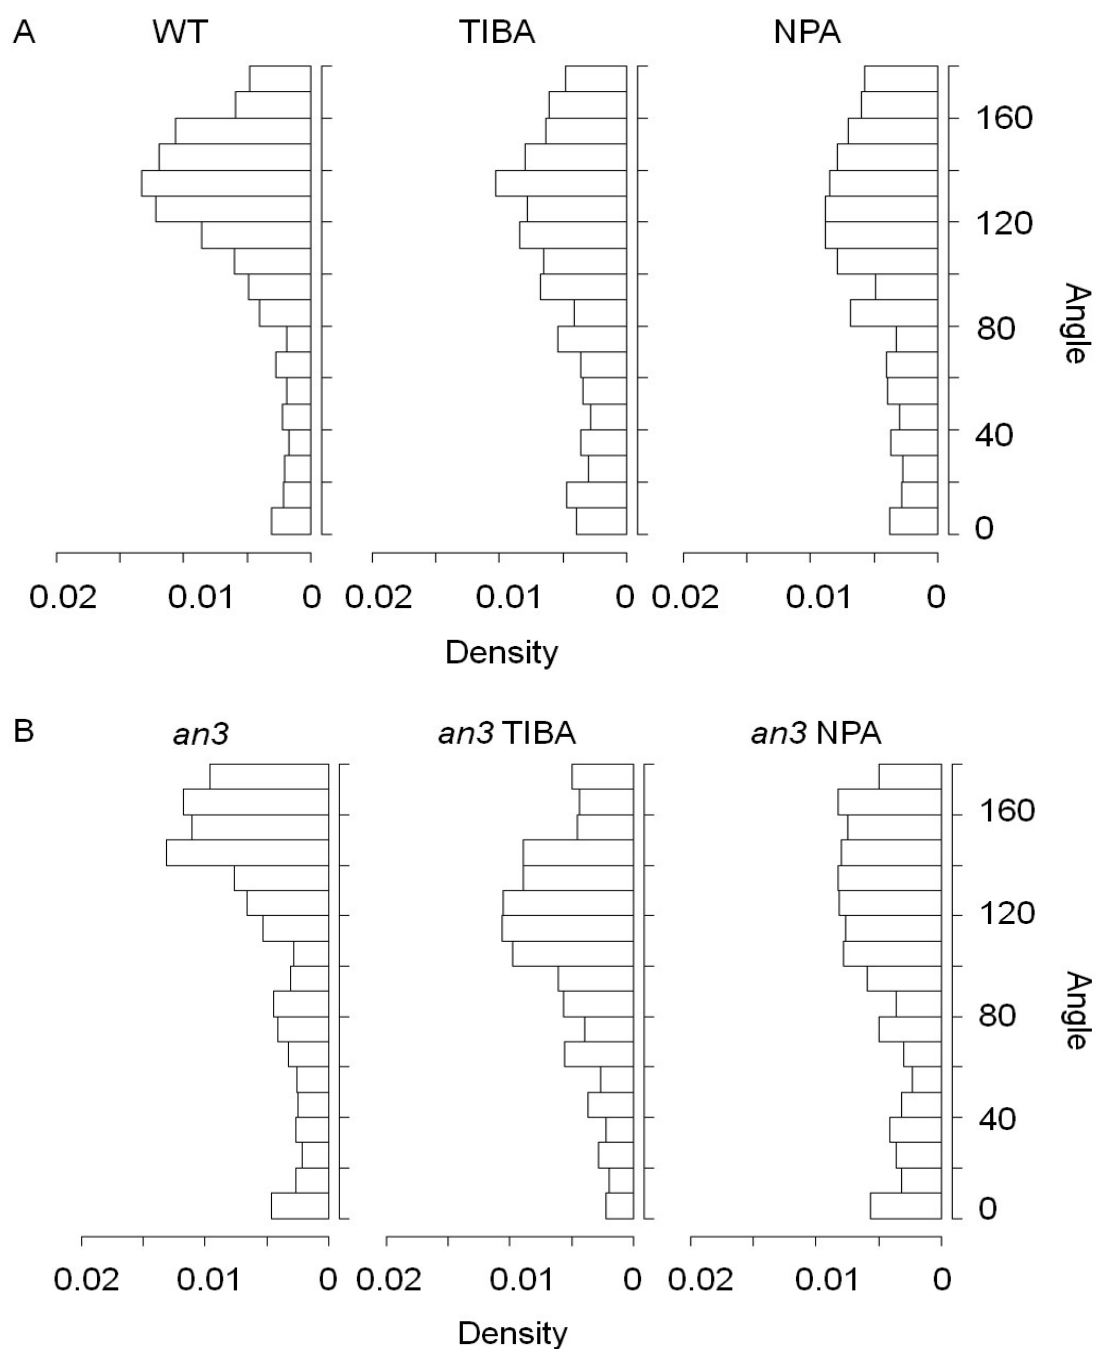

697 **Fig. 7** Cell division angles in leaf and floral organs. Four samples were investigated for  
698 each condition.

699 A: From left, WT, TIBA, NPA; 1221, 1158, 1061 pair of cells were analyzed, respectively.

700 B: From left, *an3* mutant, TIBA (*an3* mutant), NPA (*an3* mutant); 971, 703 and 604 pair

701 of cells were analyzed, respectively.

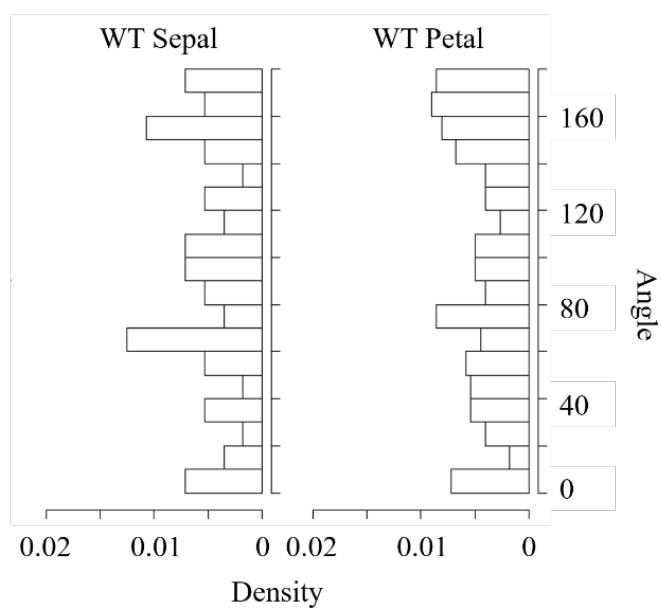

**Fig. 8** Cell division angles in floral organs. Four samples were investigated for each condition.

From left, WT sepal, WT petal; 56 and 222 pair of cells were analyzed, respectively.

640

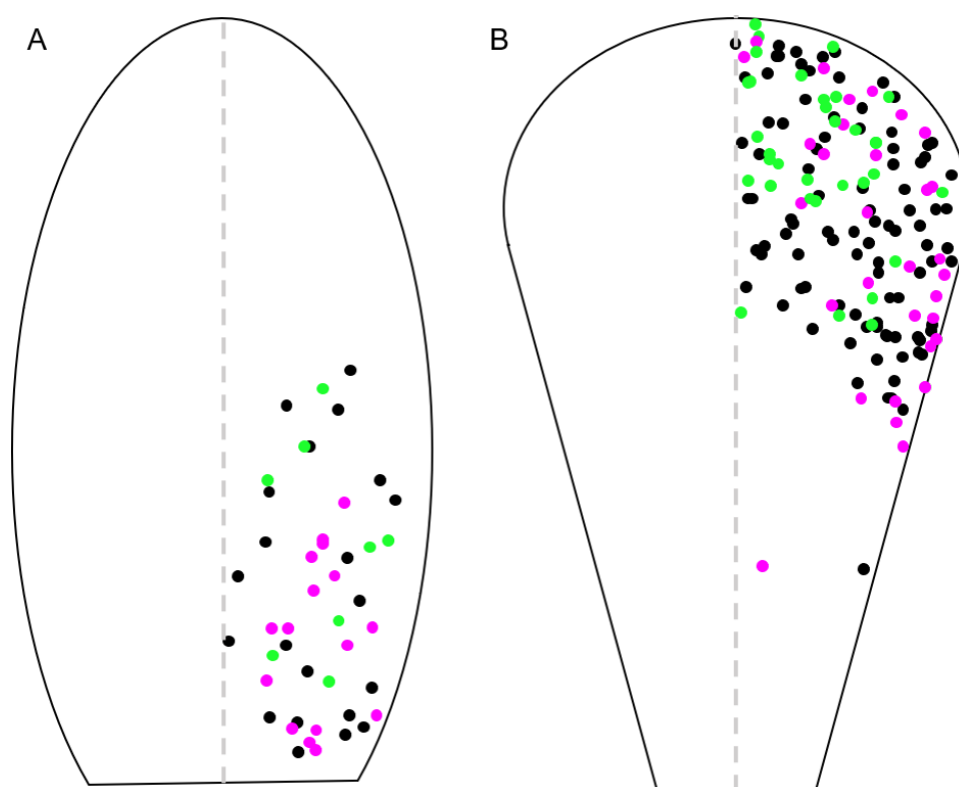

641

642 **Fig. 9** Cell division angle distribution in floral organs. The angles are mapped to the right  
643 half of the diagram, as the organs are symmetrical.

644 The magenta dots indicate the cell division angle in  $180^{\circ}$ – $140^{\circ}$  (the upper peak in Fig.  
645 8), the green dots indicate  $90^{\circ}$ – $60^{\circ}$  (the lower peak in Fig. 8), and the black dots indicate  
646 the angles that are in neither peak.  $n = 3$ . A: Sepal; 46 pair of cells were analyzed. B:

647 Petal; 159 pair of cells were analyzed.

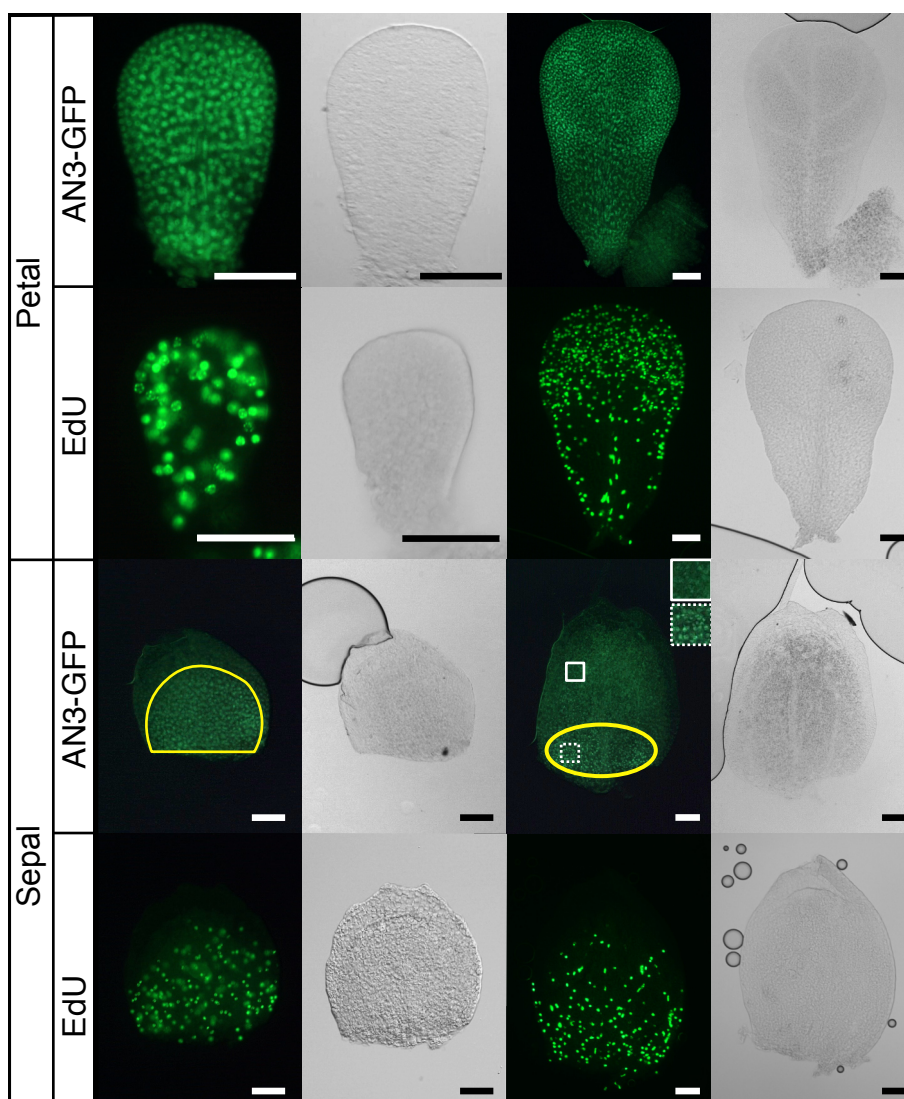

648

649 **Fig. 10** AN3-1xGFP signals and EdU staining in sepal and petal primordia.

650 The younger primordia are shown in the left column. Normal transmitted light

651 microscope images are shown on the right side of each fluorescent microscope image.

652 The yellow line shows areas with clear AN3-1xGFP signals. Magnified views in each

653 square of the sepal primordium are shown on the upper right.

654 Bar = 50  $\mu$ m

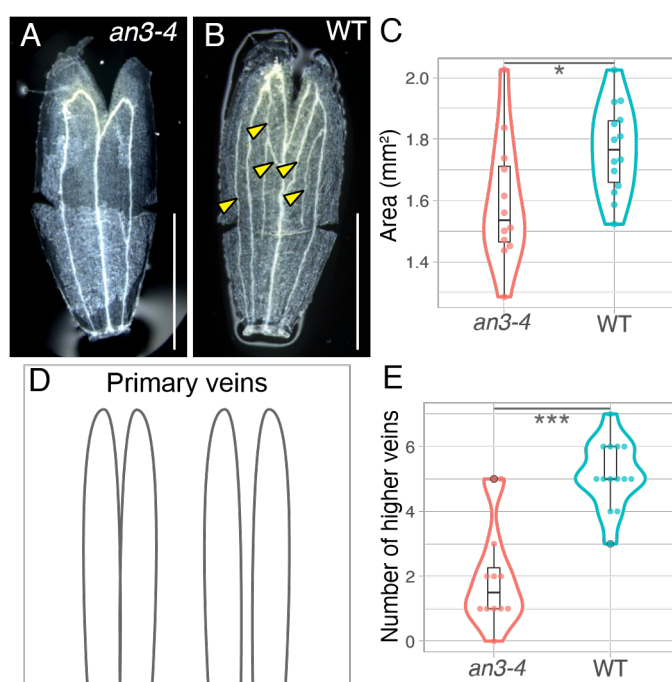

655

656 **Fig. 11** Phenotype of the sepal in the *an3-4* and the wild type. (A, B) Images of the  
657 sepal in each genotype, *an3-4* and the wild type. Some cuts were made to flatten the  
658 organs. (C) The area of sepals in each genotype. (D) Two patterns of primary veins

659 defined in this study. (E) The number of higher veins of the sepals in each genotype. \*

660  $p < 0.05$ , \*\*\*  $p < 0.001$ , Bar = 500 μm
